# Supplementary material
Source: PubMed Central journal article supplement (PMC3146392)
Supplement: NIHMS295140-supplement-01.pdf [file NIHMS295140-supplement-01.pdf]

**Supplementary information for:**

**Effects of Ligands with Different Water Solubilities on Self-Assembly and Properties of Targeted Nanoparticles**

*Pedro M. Valencia, Mikhail H. Hanewich-Hollatz, Weiwei Gao<sup>1</sup>, Fawziya Karim<sup>1</sup>, Robert Langer, Rohit Karnik, Omid C. Farokhzad*

1. Gel Permeation Chromatography (GPC) on TL-conjugated and non-conjugated PLGA-PEG copolymers

| <b>Polymer</b>  | <b>Mn</b> | <b>Mw</b> | <b>PID</b> |
|-----------------|-----------|-----------|------------|
| PLGA            | 40,066    | 54,103    | 1.35       |
| PEG             | 4,603     | 5,221     | 1.13       |
| PLGA-PEG        | 47,751    | 57,703    | 1.21       |
| PLGA-PEG-Folate | 49,551    | 59,789    | 1.20       |
| PLGA-PEG-RGD    | 50,005    | 61,002    | 1.22       |

2. MALDI-TOF to verify conjugation of PEG-RGD and PEG Folate.

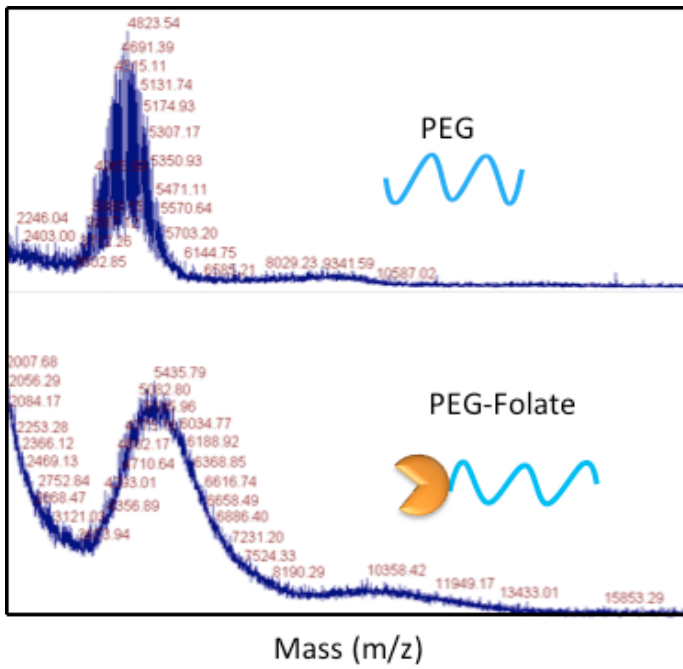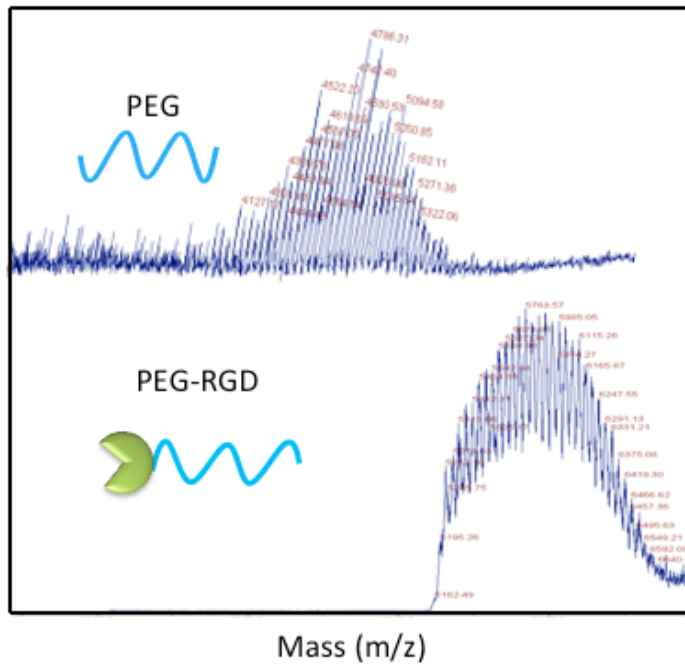

**Note:** No free folate or free RGD was observed.

### 3. UV-VIS to quantify amount of folate present on PLGA-PEG-Folate

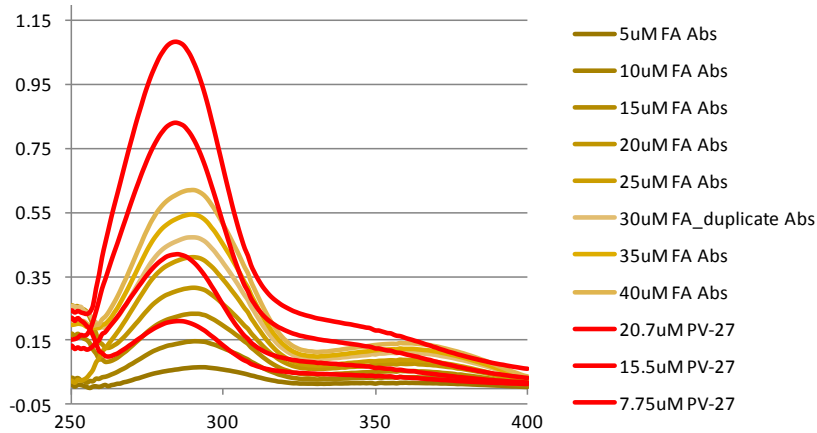

Yellow/green colors correspond to calibration points and red corresponds to PLGA-PEG-Folate.

### 4. <sup>1</sup>H NMR on PLGA-PEG-Folate

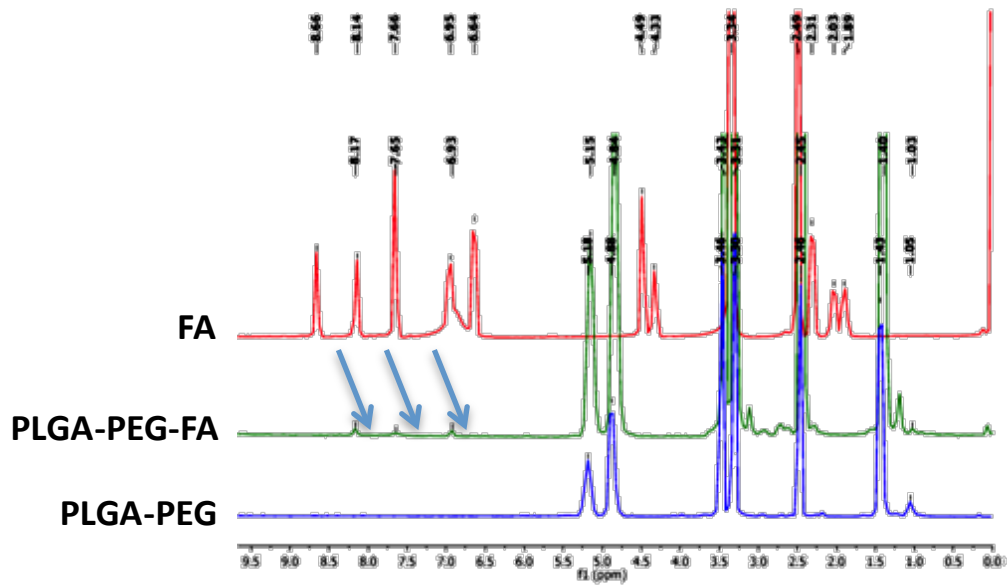

Among other factors, PLGA-PEG-Folate and PLGA-PEG-RGD conjugation efficiencies might affect the accuracy of the comparison of expected versus detected number of folate and RGD molecules on the nanoparticle surface. However, EDC/NHS reactions are known to high efficiencies up to 95% (Lee, S., Murthy, N., Biochem and Biophys Res Comm., 360 p275-9, 2007).
